# Supplementary material for: From structural properties of the EuIII complex with ethylenediaminetetra(methylenephosphonic acid) (H8EDTMP) towards biomedical applications
Source: Royal Society of Chemistry journal article supplement (doi:10.1039/b606420e), 2006-01-01
Supplement: b606420e.pdf [file b606420e.pdf]

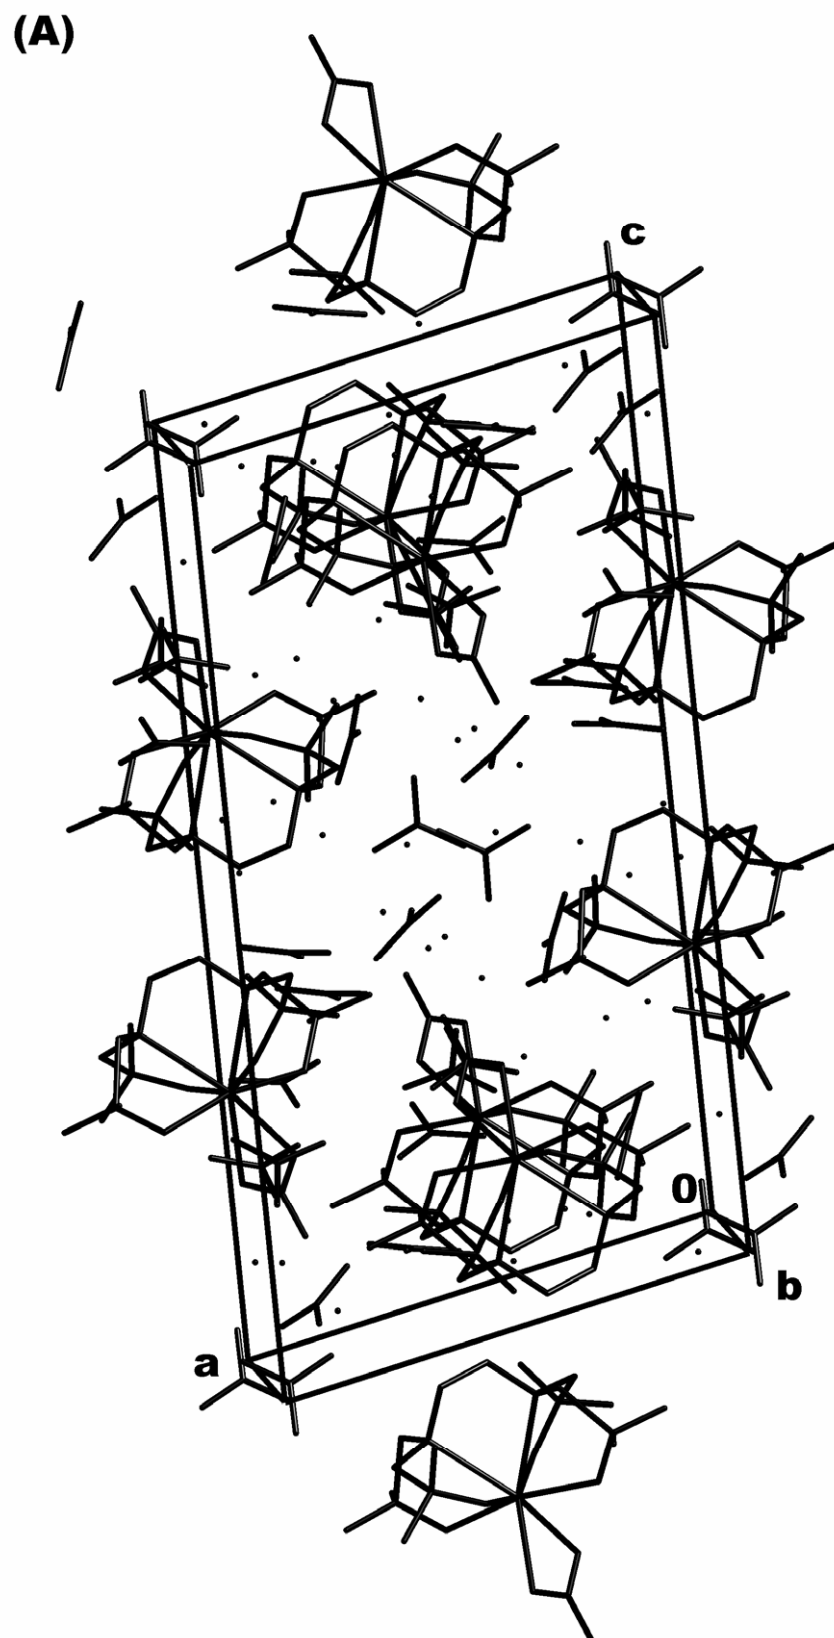

Figure S1A. A view of the unit cell of  $[\text{C}(\text{NH}_2)_3]_7[\text{Eu}(\text{EDTMP})(\text{CO}_3)] \cdot 10\text{H}_2\text{O}$ .

**(B)**

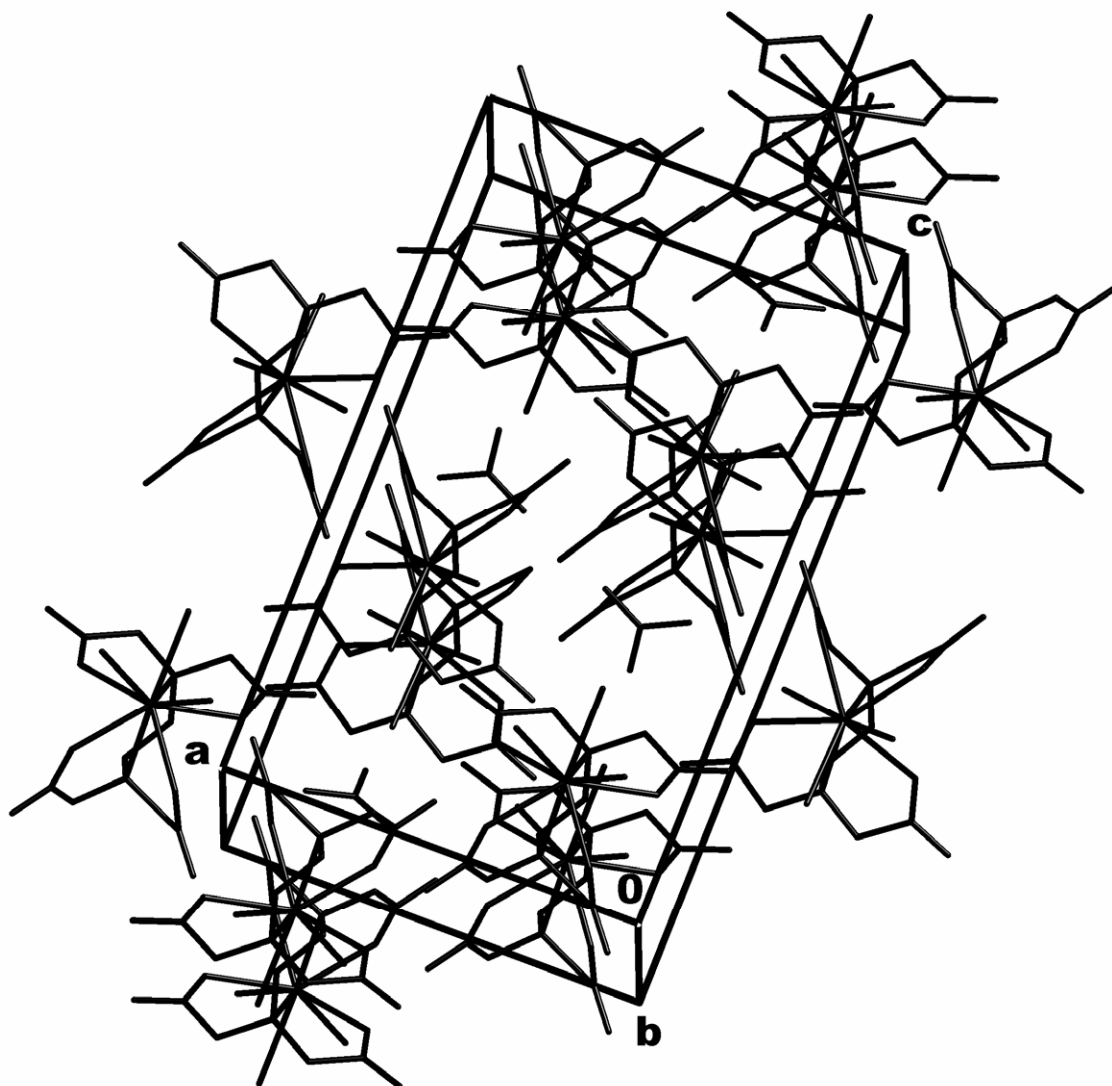

Figure S1B. A view of the unit cell of [C(NH<sub>2</sub>)<sub>3</sub>][Eu(EDTA)(H<sub>2</sub>O)<sub>3</sub>].
